# Supplementary material
Source: PubMed Central journal article supplement (PMC2981138)
Supplement: NIHMS234207-supplement-Supp_Table_S1-_S2.pdf [file NIHMS234207-supplement-Supp_Table_S1-_S2.pdf]

## Supplementary Materials

### PhoB regulates both environmental and virulence gene expression in *Vibrio cholerae*

Jason T. Pratt, Ayman M. Ismail and Andrew Camilli

Table 1. Bacterial strains and plasmids used in this study

| Strain or plasmid                 | Relevant Genotype                                                                                                         | Reference                    |
|-----------------------------------|---------------------------------------------------------------------------------------------------------------------------|------------------------------|
| <b><i>E. coli</i> strains</b>     |                                                                                                                           |                              |
| DH5 $\alpha$                      | F- $\Delta$ ( <i>lacZYA-argF</i> ) <i>U169 recA1 endA1 hsdR17 supE44 thi-1 gyrA96 relA1</i>                               | Laboratory strain            |
| DH5 $\alpha$ $\lambda$ pir        | F- $\Delta$ ( <i>lacZYA-argF</i> ) <i>U169 recA1 endA1 hsdR17 supE44 thi-1 gyrA96 relA1</i> $\lambda$ :: <i>pir</i>       | Laboratory strain            |
| SM10 $\lambda$ pir                | <i>thi recA thr leu tonA lacY supE RP4-2-Tc::Mu</i> $\lambda$ :: <i>pir</i>                                               | Laboratory strain            |
| <b><i>V. cholerae</i> strains</b> |                                                                                                                           |                              |
| O395                              | classical biotype, Sm <sup>r</sup>                                                                                        | Taylor et al. (1987)         |
| AC61                              | O395 <i>lacZ::res-Tet-res</i> , Sm <sup>r</sup> , Tc <sup>r</sup>                                                         | Camilli and Mekalanos (1995) |
| AC744                             | O395 $\Delta$ <i>toxR</i> , Sm <sup>r</sup>                                                                               | Klose and Mekalanos (1998)   |
| AC1596                            | AC61 <i>vieAE170A</i> , Sm <sup>r</sup> , Tc <sup>r</sup>                                                                 | Tischler and Camilli (2004)  |
| AC3475                            | AC61 $\Delta$ <i>pst</i> , Sm <sup>r</sup> , Tc <sup>r</sup>                                                              | This work                    |
| AC3476                            | AC61 $\Delta$ <i>phoB</i> , Sm <sup>r</sup> , Tc <sup>r</sup>                                                             | This work                    |
| AC3477                            | AC61 $\Delta$ <i>pst</i> $\Delta$ <i>phoB</i> , Sm <sup>r</sup> , Tc <sup>r</sup>                                         | This work                    |
| AC3478                            | AC61 $\Delta$ <i>phoB</i> pMMBneo:: <i>phoB</i> , Sm <sup>r</sup> , Tc <sup>r</sup> , Kn <sup>r</sup>                     | This work                    |
| AC3479                            | AC61 $\Delta$ <i>phoB::phoB</i> rev, Sm <sup>r</sup> , Tc <sup>r</sup>                                                    | This work                    |
| AC3480                            | AC61 $\Delta$ <i>pst</i> $\Delta$ <i>phoB::phoB</i> rev, Sm <sup>r</sup> , Tc <sup>r</sup>                                | This work                    |
| AC3492                            | AC61 <i>pstAR454Q</i> , Sm <sup>r</sup> , Tc <sup>r</sup>                                                                 | This work                    |
| AC3502                            | AC61 $\Delta$ <i>phoR</i> , Sm <sup>r</sup> , Tc <sup>r</sup>                                                             | This work                    |
| AC3503                            | AC61 $\Delta$ <i>pst</i> $\Delta$ <i>phoB</i> pMMBneo:: <i>phoB</i> , Sm <sup>r</sup> , Tc <sup>r</sup> , Kn <sup>r</sup> | This work                    |
| AC3509                            | O395 pMMBneo, Sm <sup>r</sup> , Kn <sup>r</sup>                                                                           | Osorio et al. (2005)         |
| MKW107                            | O395 pCTX <sup>calc</sup> $\Phi$ – Kn, Sm <sup>r</sup> , Kn <sup>r</sup>                                                  | Davis et al., (1998)         |
| <b>Plasmids</b>                   |                                                                                                                           |                              |
| pMMBneo                           | IncQ broad-host-range cloning vector, Kn <sup>r</sup>                                                                     | Osorio et al., (2005)        |
| pAC3493                           | pMMBneo:: <i>phoB</i> , Kn <sup>r</sup>                                                                                   | This work                    |
| pCVD442                           | <i>oriR6K mobRP4 sacB</i> , Amp <sup>r</sup>                                                                              | Donnenberg and Kaper (1991)  |
| pAC3494                           | pCVD442:: <i>pst</i> , Amp <sup>r</sup>                                                                                   | This work                    |
| pAC3495                           | pCVD442:: <i>phoB</i> , Amp <sup>r</sup>                                                                                  | This work                    |
| pAC3496                           | pCVD442:: <i>pstAR454Q</i> , Amp <sup>r</sup>                                                                             | This work                    |
| pAC3499                           | pCVD442:: <i>phoB</i> rev, Amp <sup>r</sup>                                                                               | This work                    |
| pAC3521                           | pCVD442:: <i>phoR</i> , Amp <sup>r</sup>                                                                                  | This work                    |
| pAIV71                            | pGEX:: <i>PhoB</i> <sup>CA</sup> , Amp <sup>r</sup>                                                                       | This work                    |
| pAIV86                            | pET15B:: <i>AphB</i> , Amp <sup>r</sup>                                                                                   | This work                    |
| pWEL18                            | pTXB-1:: <i>AphA</i> , Amp <sup>r</sup>                                                                                   | Kovacikova et al. (2003)     |

Table 2. Primers used in this study

| Primer Name         | Primer Sequence*                                                |
|---------------------|-----------------------------------------------------------------|
| phoBF1              | 5' <u>GGTCTAGAG</u> TCGTTTCGACCGCTAT TTC 3'                     |
| phoBF2              | 5' GTCTAGAAGGGCCTAAGAGGGTGTAGAACAAATC 3'                        |
| phoBR1              | 5' CCTCTTAGGCCCTTCTAGACATAATTGATTAACCTTTG 3'                    |
| phoBR2              | 5' <u>GGTCTAGAT</u> CATCACACCATGGGCTTTA 3'                      |
| pstF1               | 5' <u>GGTCTAGAC</u> AGTTGGTCGGTTGGAATCT 3'                      |
| pstF2               | 5' CAGACAGCCAAAGCCGAGTTTGTAAGCGG 3'                             |
| pstR1               | 5' AACTCGGCTTTGGCTGTCTGACCATGCTT 3'                             |
| pstR2               | 5' <u>GGTCTAGACT</u> GCAAGAGTGGGTGAAACA 3'                      |
| phoRF1              | 5' <u>GGTCTAGAC</u> ATGGCGTTGGTGAAAAAC 3'                       |
| phoRF2              | 5' GGTTGAACGTATGAGCCGCATGCTAAGTC 3'                             |
| phoRR1              | 5' TGCGGCTCATAACGTTCAACCATACTGATTTGTTCT 3'                      |
| phoRR2              | 5' <u>GGTCTAGAC</u> CCCGACAGAATATTGGCTTG 3'                     |
| phoBF               | 5' <u>GCCCTAGG</u> TTTAGGATACATTTTTATGTCTAGAAGGATTCTGGTTGTTG 3' |
| phoBR               | 5' <u>GGGCATG</u> CTTAGGCTTTGGTTGAAAAACG 3'                     |
| D10AR1              | 5' CATTTACGAATCGGTGCTTCGGCTTCAACAACCAGAATCCTTCTA 3'             |
| D10AF2              | 5' TAGAAGGATTCTGGTTGTTGAAGCCGAAGCACCGATTCTGTAAGT 3'             |
| D53ER1              | 5' GCAACATCCATTCAAGCAGGACGAGATCAGGAA 3'                         |
| D53EF2              | 5' CGTCCTGCTTGAATGGATGTTGCCTGGTGGTAG 3'                         |
| tcpPF               | 5' AAAATAATGATGTGAAAAATCAGCTT 3'                                |
| tcpPR               | 5' CACCAAAGGTTATCGGGAAA 3'                                      |
| tcpPF1              | 5' GTACCGAGTTCGACCGTTTT 3'                                      |
| tcpPR2              | 5' GCGAACATGAGTTTTTGTCTGACA 3'                                  |
| Mut1R1              | 5' GAACTCGCCTGCATAATATTTAAATTTGTTAAAAAAAATAAAAT 3'              |
| Mut1F2              | 5' AATATTATGCAGGCGAGTTCTCATTATCAACTGC 3'                        |
| Mut2R1              | 5' TGATACTGCGCACTCGTGTGCATAATATTTAAATTTGTTAAAAAAAATAAAAT 3'     |
| Mut2F2              | 5' ATGCACACGAGTGCAGTATCAACTGCAAAATTAGATTGCA 3'                  |
| R454QF1             | 5' GCTTGCCTGTTCAAAGTGGT 3'                                      |
| R454QF2             | 5' GATTGATTTTGGCGATCGCCCAAGCAGCCGGTGAAGTGGCTCC 3'               |
| R454QR1             | 5' GGAGCCACTTCACCGGCTGCTTGGGCGATCGCCAAAATCAATC 3'               |
| R454QR2             | 5' CATCATCTAACCGCGGCTA 3'                                       |
| tcpAqF              | 5' CGAAGTGATCATCGTTCTAGGC 3'                                    |
| tcpAqR              | 5' TCTGTGTCAGTGCAACTTGG 3'                                      |
| toxTqF              | 5' GCTGTCTTTTCTGAAGTGGT 3'                                      |
| toxTqR              | 5' TTCTACTTTTCGAGAAGAACCCTGA 3'                                 |
| toxRqF              | 5' GTATTACTGCTCACTAACCAGAGC 3'                                  |
| toxRqR              | 5' CCAGTTTGAAAGATCAGGGTGG 3'                                    |
| tcpPqF              | 5' CTCTGTGAATATCATCTGCCC 3'                                     |
| tcpPqR              | 5' GCCTGAGTTAGACTTTCAGAGC 3'                                    |
| rpoBqF              | 5' CTGTCTCAAGCCGGTTACAA 3'                                      |
| rpoBqR              | 5' TTTCTACCAGTGCAGAGATGC 3'                                     |
| F NdeI ntPhoB       | 5' TCACTGTG <u>CATAT</u> GTCTAGAAGGATTCTGGTTGTTG 3'             |
| R ctPhoB st BamHI   | 5' GAGCGAGT <u>CGGATC</u> CTTAGGCTTTGGTTGAAAAACGATAC 3'         |
| F PhoB T201C        | 5' CATCAACCTCATCAAGCACATGAAGCGCGAAGAGATG 3'                     |
| R PhoB T201C        | 5' CATCTCTTCGCGCTTCATGTGCTTGATGAGGTTGATG 3'                     |
| F NdeI ntAphB       | 5' TCACTGTG <u>CATAT</u> GCAACATAATGTGTCAGAAACGATGAAAC 3'       |
| R ctAphB st HindIII | 5' GAGCGAGT <u>CAAGCT</u> TTTATTGCAGGTGGTAGCCAATCAC 3'          |
| F 6FAM tcpPH -175   | 5' GATCGGAATTCCTGTAACGAATATTGCTTTCCG 3'                         |
| F 6FAM rcpPH -41    | 5' CAACTGCAAAATTAGATTGCAAATAA 3'                                |

\*Restriction sites are underlined

## References

- Camilli, A., and Mekalanos, J.J. (1995) Use of recombinase gene fusions to identify *Vibrio cholerae* genes induced during infection. *Mol Microbiol* **18**:671-683.
- Davis, B.M., Kimsey, H.H., Chang, W., and Waldor, M.K. (1999) The *Vibrio cholerae*. O139 Calcutta bacteriophage CTX $\Phi$  is infectious and encodes a novel repressor. *J Bacteriol* **181**:6779–6787.
- Donnenberg, M.S., and Kaper, J.B. (1991) Construction of an *eae* deletion mutant of enteropathogenic *Escherichia coli* by using a positive-selection suicide vector. *Infect Immun* **59**:4310-4317.
- Klose, K.E., and Mekalanos, J.J. (1998) Differential regulation of multiple flagellins in *Vibrio cholerae*. *J Bacteriol* **180**:303-316.
- Kovacikova, G., Lin, W., and Skorupski, K. (2003) The virulence activator AphA links quorum sensing to pathogenesis and physiology in *Vibrio cholerae* by repressing the expression of a penicillin amidase gene on the small chromosome. *J Bacteriol* **185**:4825-4836.
- Osorio, C.G., Crawford, J.A., Michalski, J., Martinez-Wilson, H., Kaper, J.B., and Camilli, A. (2005) Second-generation recombination-based in vivo expression technology for large-scale screening for *Vibrio cholerae* genes induced during infection of the mouse small intestine. *Infect Immun* **73**:972-980.
- Taylor, R. K., Miller, V.L., Furlong, D.B., and Mekalanos, J.J. (1987) Use of *phoA* fusions to identify a pilus colonization factor co-coordinately regulated with cholera toxin. *Proc Natl Acad Sci USA* **84**:2833-2837.
- Tischler, A.D., and Camilli, A. (2004) Cyclic diguanylate (c-di-GMP) regulates *Vibrio cholerae* biofilm formation. *Mol Microbiol* **53**:857-869.
